# Supplementary material for: Comparison between Mid-Infrared (ATR-FTIR) Spectroscopy and Official Analysis Methods for Determination of the Concentrations of Alcohol, SO2, and Total Acids in Wine
Source: MDPI journal article supplement (doi:10.3390/separations8100191), 2021-10-17
Supplement: s1 [file s1]

Supplementary Materials

# Comparison Between Mid-infrared (ATR-FTIR) Spectroscopy and Official Analysis Methods for Determination of the Concentrations of Alcohol, SO<sub>2</sub>, and Total Acids in Wine

Irene Dini <sup>1,\*</sup>, Ritamaria Di Lorenzo <sup>1</sup>, Antonello Senatore <sup>2</sup>, Daniele Coppola <sup>2</sup> and Sonia Laneri <sup>1</sup>

<sup>1</sup> Department of Pharmacy, University of Naples Federico II, Via Domenico Montesano 49, 80131 Napoli, Italy; ritamaria.dilorenzo@unina.it (R.D.L.); slaneri@unina.it (S.L.)

<sup>2</sup> Lcm Laboratorio Chimico Merceologico, Corso Meridionale, 80143 Napoli, Italy; a.senatore@si-impresa.na.camcom.it (A.S.); d.coppola@si-impresa.na.camcom.it (D.C.)

\* Correspondence: irdini@unina.it

**Citation:** Dini, I.; Di Lorenzo, R.; Senatore, A.; Coppola, D.; Laneri, S. Comparison between Mid-infrared (ATR-FTIR) Spectroscopy and Official Analysis Methods for Determination of the Concentrations of Alcohol, SO<sub>2</sub>, and Total Acids in Wine. *Separations* **2021**, *8*, 191. <https://doi.org/10.3390/separations8100191>

Academic Editors: Vlad Mureșan; Cristina Anamaria Semeniciu and Antonio Martin-Esteban

Received: 29 August 2021

Accepted: 15 October 2021

Published: 17 October 2021

**Publisher's Note:** MDPI stays neutral with regard to jurisdictional claims in published maps and institutional affiliations.

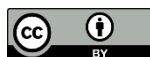

**Copyright:** © 2021 by the authors. Licensee MDPI, Basel, Switzerland. This article is an open access article distributed under the terms and conditions of the Creative Commons Attribution (CC BY) license (<http://creativecommons.org/licenses/by/4.0/>).

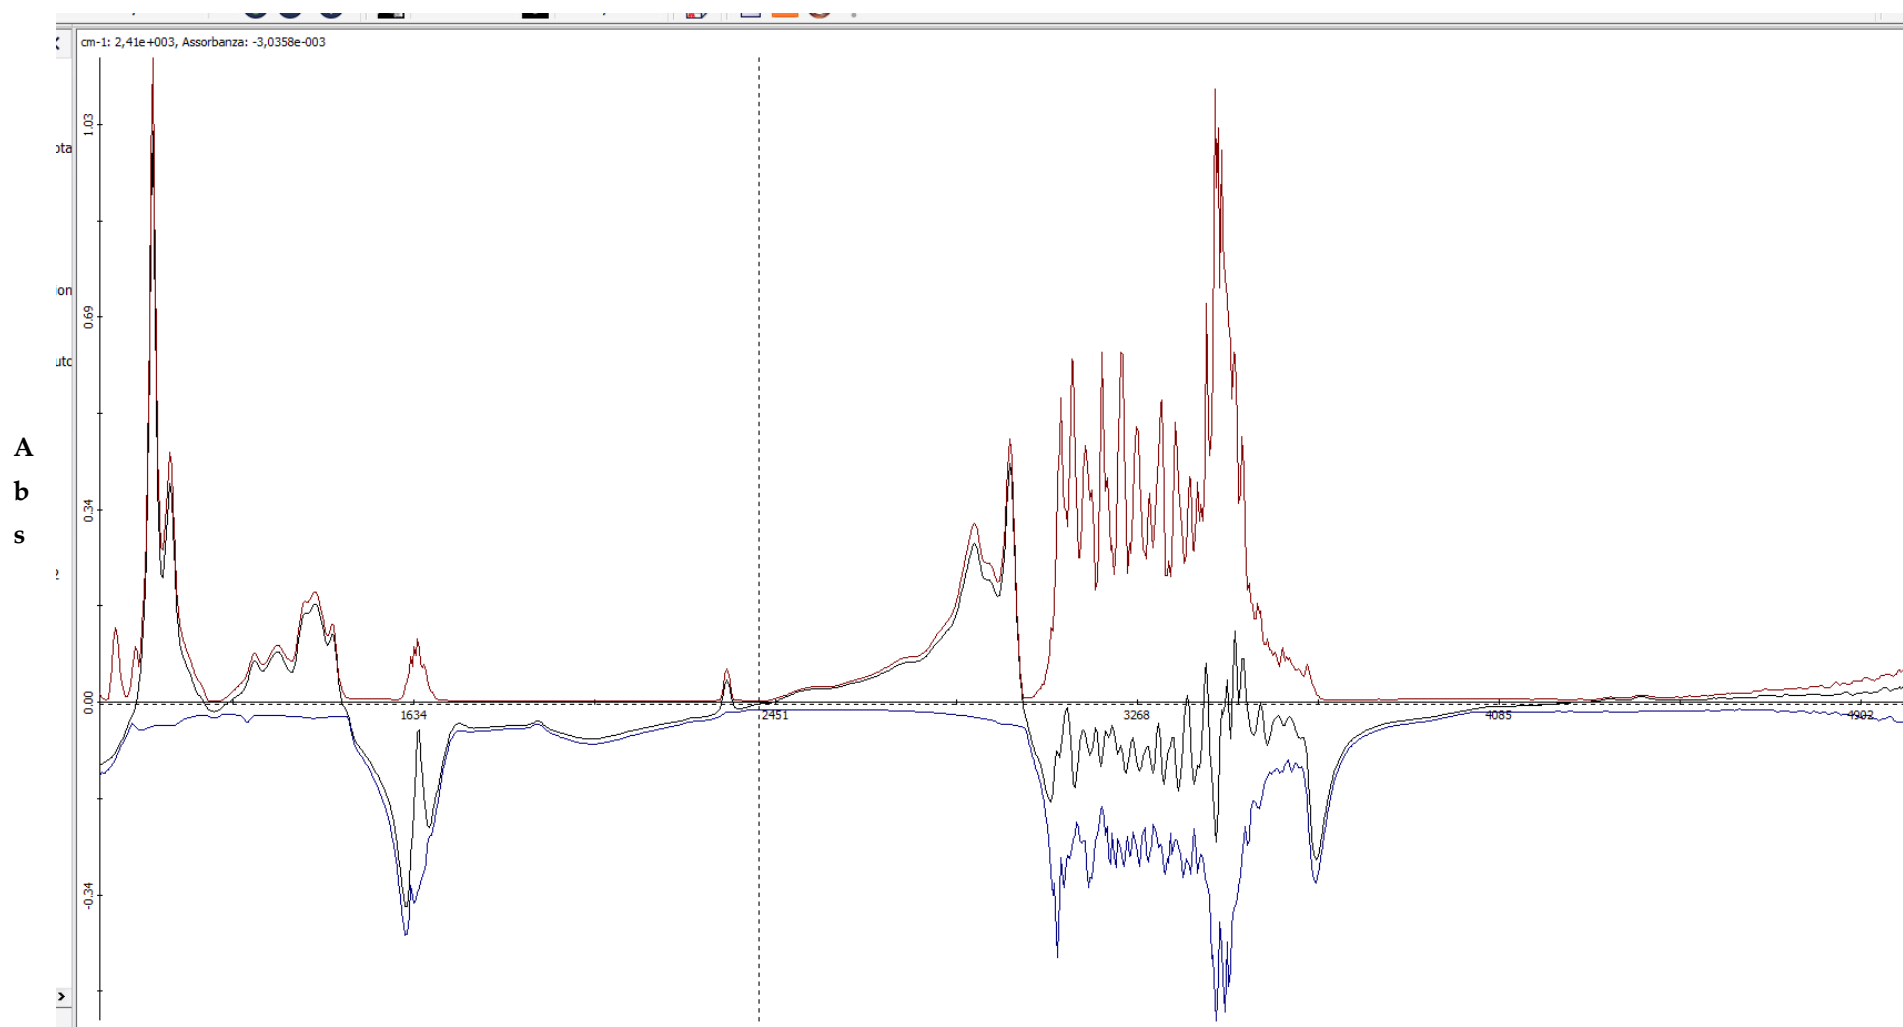

**Figure S1.** Ischia DOC Piedirosso or Per'e Palummo wine total spectrum.

A  
b  
s

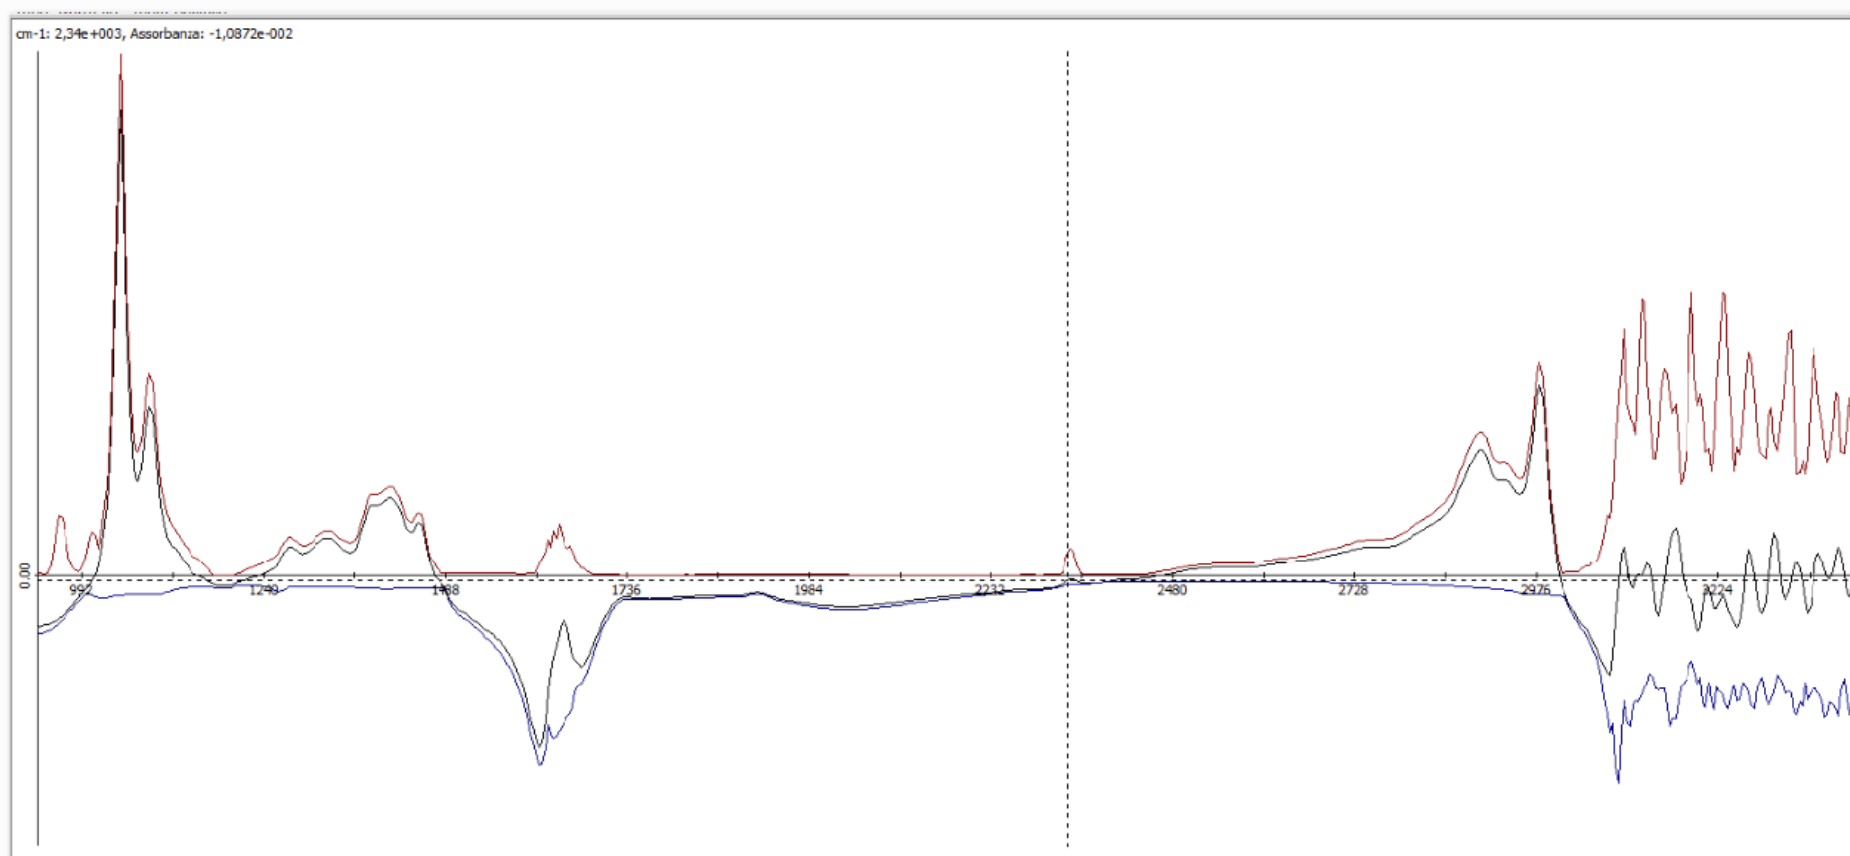

**Figure S2.** Most significant spectral frequencies for the identification of sulfur dioxide in Ischia DOC Piediroso (or Per'e Palummo) wine ( $1203.7\text{ cm}^{-1}$ ,  $1184.41\text{ cm}^{-1}$ ,  $3391.18\text{ cm}^{-1}$ ,  $1199.84\text{ cm}^{-1}$ ,  $3360.32\text{ cm}^{-1}$ ,  $1064.81\text{ cm}^{-1}$ ).

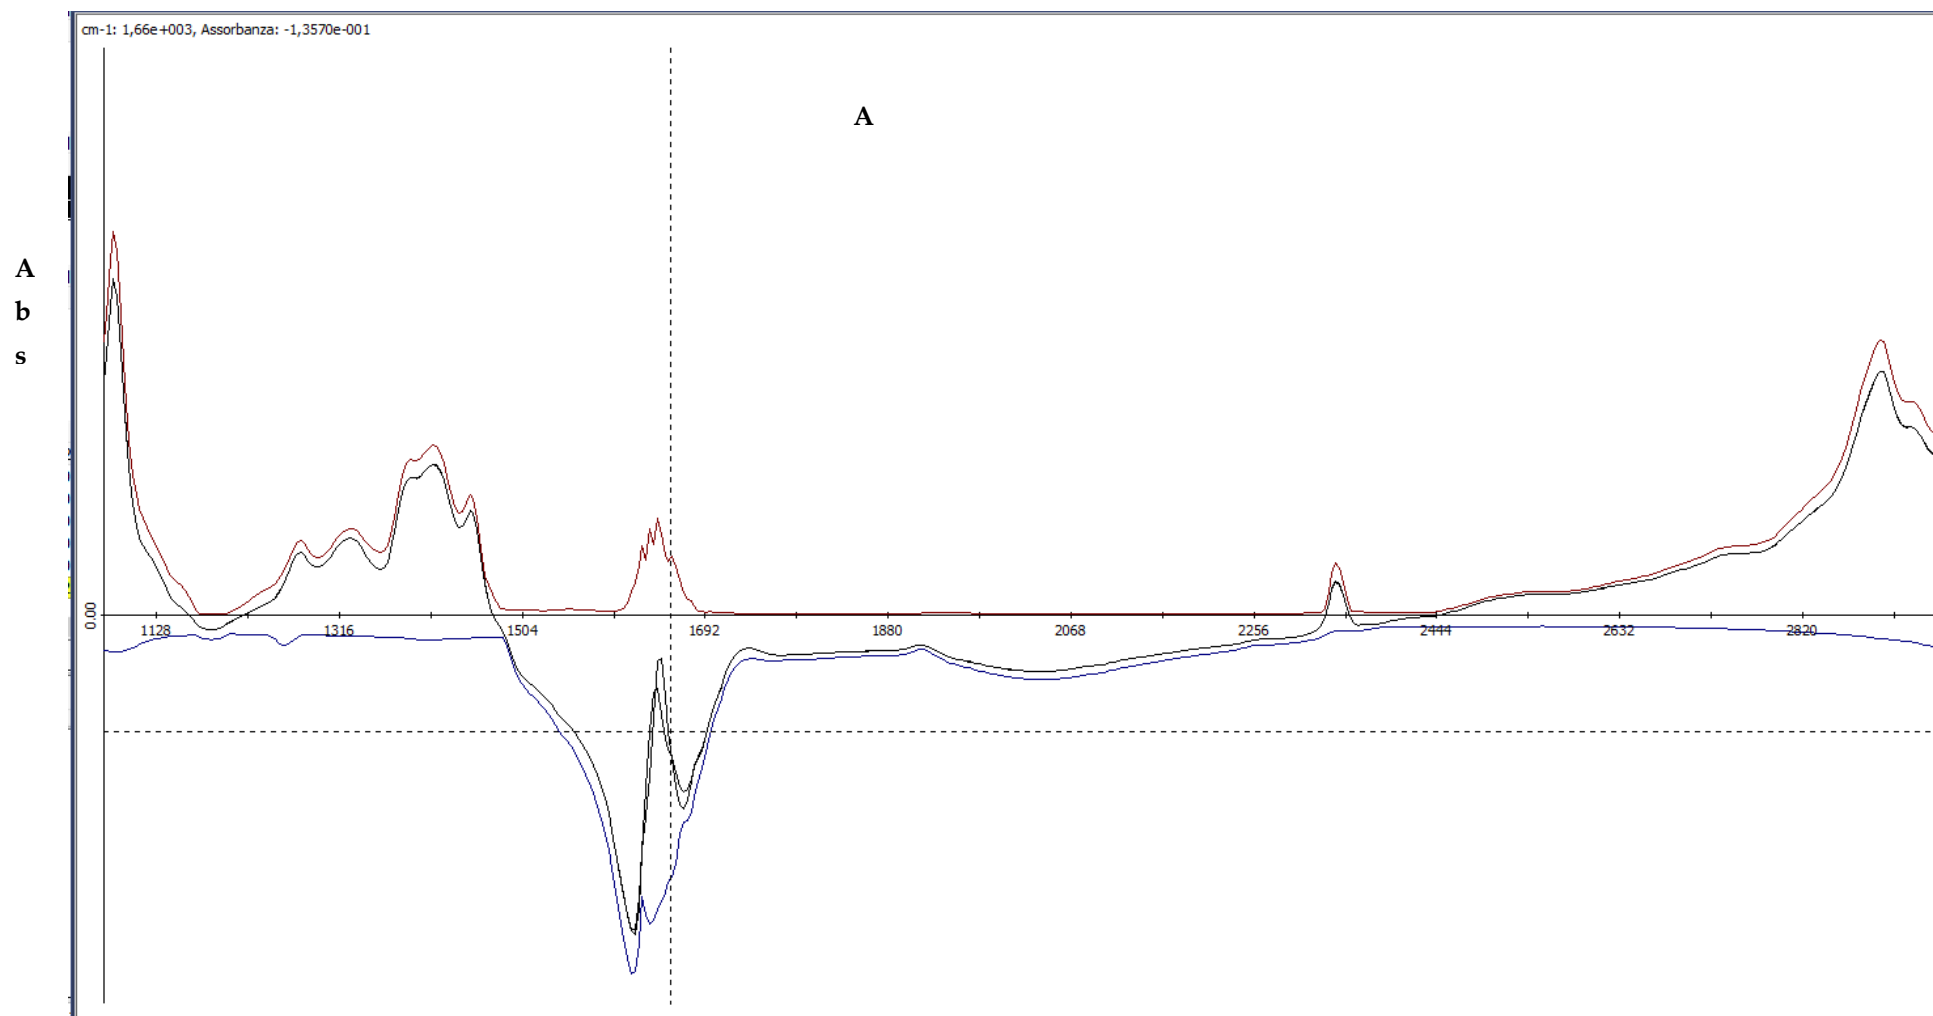

**Figure S3.** Most significant spectral frequencies for the determination of alcohol in Ischia DOC Piedirosso (or Per'e Palummo) wine ( $1103.39\text{ cm}^{-1}$ ,  $2982.23\text{ cm}^{-1}$ ,  $2970.66\text{ cm}^{-1}$ ,  $1126.54\text{ cm}^{-1}$ ).

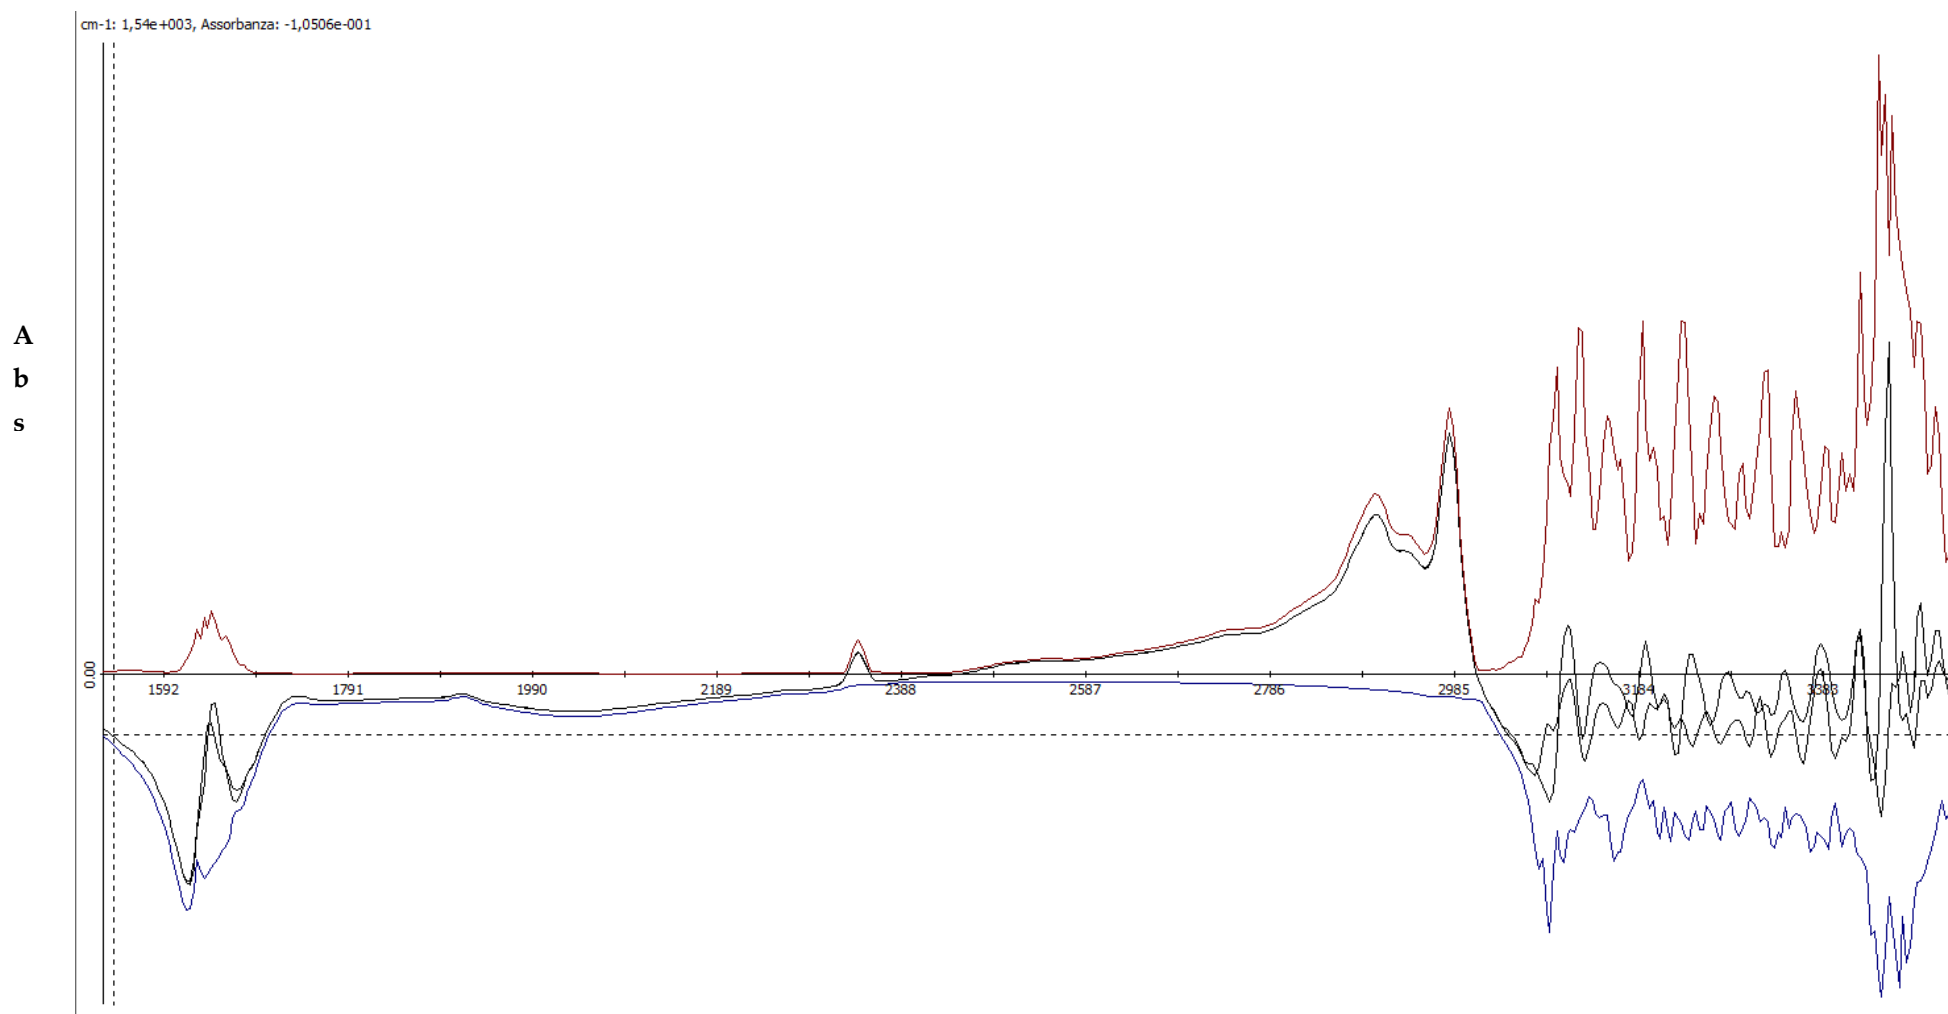

**Figure S4.** Most significant spectral frequencies for the determination of total acidity in Ischia DOC Piediroso (or Per'e Palummo) wine ( $3001.52\text{ cm}^{-1}$ ,  $2997.67\text{ cm}^{-1}$ ,  $3005.38\text{ cm}^{-1}$ ,  $1219.13\text{ cm}^{-1}$ ,  $1068.67\text{ cm}^{-1}$ ,  $1064.81\text{ cm}^{-1}$ ).

Acidità totale: 929,778cm<sup>-1</sup>; 1709,09 cm<sup>-1</sup>; 999,222 cm<sup>-1</sup>; 1728,38 cm<sup>-1</sup>; 1211,41cm<sup>-1</sup>;  
1712,95 cm<sup>-1</sup>; 995,364 cm<sup>-1</sup>; 1724,53 cm<sup>-1</sup>; 1215,27 cm<sup>-1</sup>; 1720,67 cm<sup>-1</sup>
